# Supplementary material
Source: Springer Nature journal article supplement (https://www.springermedizin.de/resource/supplementary/12885_2008_1277_MOESM7_ESM.pdf/9471622)
Supplement: MOESM7 [file 9471622]

Additional file 7

File format: DOC

Title: Algorithm for computing Metastasis Score (MS)

Description: The relative changes in gene expression are calculated by  $\Delta\Delta\text{Ct}$  method. The level of mRNA of each of the 14 profiled genes is defined as:

$$\Delta\text{Ct}_{\text{test}} = (\text{Ct}_{\text{GOI}} - \text{Ct}_{\text{EC}})_{\text{test RNA}}$$

$$\Delta\text{Ct}_{\text{ref}} = (\text{Ct}_{\text{GOI}} - \text{Ct}_{\text{EC}})_{\text{ref RNA}}$$

$$G_i = \Delta\Delta\text{Ct} = \Delta\text{Ct}_{\text{test}} - \Delta\text{Ct}_{\text{ref}}$$

where GOI = gene of interest (each of 14 signature genes), EC = endogenous control, test RNA = RNA obtained from the patient sample, and ref RNA = a calibrator reference RNA. The expression level (Ct) measured by RT-PCR of each signature gene is first normalized to the average of three endogenous control genes resulting  $\Delta\text{Ct}_{\text{test}}$  and  $\Delta\text{Ct}_{\text{ref}}$  for test RNA and reference RNA, respectively. Then, the difference ( $\Delta\Delta\text{Ct}$ ) between  $\Delta\text{Ct}_{\text{test}}$  and  $\Delta\text{Ct}_{\text{ref}}$  is the relative expression level of the gene of interest.

Since the coefficients of the 14 genes were of similar magnitude (Table S.8), a summary score was calculated as the sum of the 14  $\Delta\Delta\text{Ct}$  measurements for each subject, and since lower values of the score were associated with higher probability of metastasis, the final MS for each subject is defined as the negative of the summary score.

The  $\Delta\Delta\text{Ct}$  value, obtained in gene expression profiling for each of the 14 signature genes, can be used in the following formula to generate a MS:

$$MS = - \left[ \sum_{i=1}^{14} G_i \right]$$

in which  $G_i$  represents the expression level of each gene (i) of the 14-gene prognostic signature. The value of  $G_i$  is the  $\Delta\Delta\text{Ct}$  obtained in expression profiling described above. The median MS observed in the training set was used as a cutoff to determine categories of high and low prognostic risk.
